# Supplementary material for: Prediction of high photoconversion efficiency and photocatalytic water splitting in vertically stacked TMD heterojunctions MX 2 /WS 2 and MX 2 /MoSe 2 (M = Cr, Mo, W; X = S, Se, Te)
Source: Royal Society of Chemistry journal article supplement (doi:10.1039/d4ta08513b), 2025-01-01
Supplement: d4ta08513b1.pdf [file d4ta08513b1.pdf]

Electronic Supplementary Information for

Prediction of High Photoconversion Efficiency and  
Photocatalytic Water Splitting in Vertically Stacked TMD  
Heterojunctions  $\text{MX}_2/\text{WS}_2$  and  $\text{MX}_2/\text{MoSe}_2$  (M=Cr, Mo, W;  
X=S, Se, Te)

Jiancheng Ma<sup>a</sup>, Jiafei Pang<sup>a</sup>, Jinni Yang<sup>a</sup>, Wanying Xie<sup>a</sup>, Xiaoyu Kuang<sup>\*a</sup> and Aijie Mao<sup>\*b</sup>

<sup>a</sup>*Institute of Atomic and Molecular Physics, Sichuan University, Chengdu, 610065, China*

<sup>b</sup>*College of Physics, Sichuan University, Chengdu 610065, China.*

*\*E-mails: scu\_kuang@163.com; scu\_mij@126.com*

**Computational Methods** The Gibbs free energies for the oxygen evolution reaction (OER) and hydrogen evolution reaction (HER) are calculated based on the model proposed by Nørskov et al.<sup>1,2</sup> The OER follows these sequential steps:

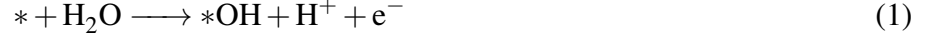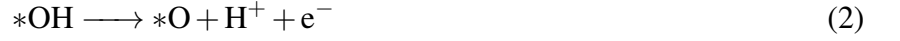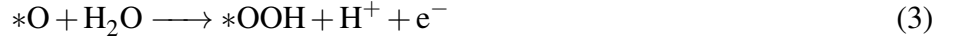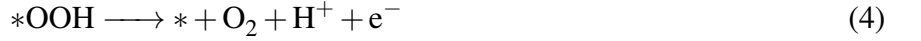

where \* represents the absorption site on the slab for intermediates. For each step, the Gibbs reaction free energy ( $\Delta G$ ) is calculated by

$$\Delta G = \Delta E + \Delta E_{\text{ZPE}} - T\Delta S + \Delta G_U + \Delta G_{\text{pH}} \quad (5)$$

where  $\Delta E$  is the total energy difference between reactants and products of reactions,  $\Delta E_{\text{ZPE}}$  is the zero point energy correction,  $\Delta S$  is the vibrational entropy change at finite temperature T,  $\Delta G_U = -eU$  incorporates the effect of the electrode potential, where e is elementary charge, U is the electrode potential (U=1.23),  $\Delta G_{\text{pH}}$  is the correction of the  $\text{H}^+$  free energy. The calculations are performed at pH = 0.

The HER proceeds through the following steps:

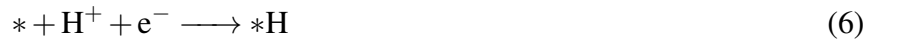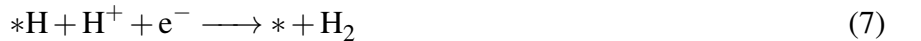

The free energy is calculated by

$$\Delta G_{* \text{H}} = \Delta E_{* \text{H}} + \Delta E_{\text{ZPE}} - T\Delta S \quad (8)$$

$$\Delta E_{* \text{H}} = E_{* \text{H}} - E_* - \frac{1}{2}E_{\text{H}_2} \quad (9)$$

where  $\Delta E_{* \text{H}}$  is the hydrogen chemisorption energy, where  $E_{* \text{H}}$ ,  $E_*$  and  $E_{\text{H}_2}$  are the energies of absorbed slab, pure slab and  $\text{H}_2$  gas, respectively.

The relaxation time ( $\tau$ ) and carrier mobility ( $\mu$ ) at 300 K have mathematical formulas that follow the deformation potential (DP) theory:<sup>3-5</sup>

$$\mu = \frac{e\hbar^3 C_{2D}}{K_B T m^* m_d E_l^2} \quad (10)$$

$$m^* = \hbar^2 \frac{\partial^2 E}{\partial^2 K} \quad (11)$$

$$\tau = \frac{\mu m^*}{e} \quad (12)$$

where  $K_B$  is the Boltzmann constant,  $T$  is the temperature (300 K),  $m^*$  is the effective mass,  $m_d = \sqrt{m^* m_{\perp}^*}$  represents the average effective mass,  $E_l = \Delta V / (\Delta l / l_0)$  is the deformation potential constant ( $\Delta V$  is the amount of change in the position of band edges caused by stresses),  $e$  is the electronic charge,  $\hbar$  is the reduced Planck constant,  $C_{2D} = [\partial^2 E_T / \partial (\Delta l / l)^2] / S_0$  is the modulus of elasticity ( $E_T$  is the total energy, and  $S_0$  indicates the area of the optimized cell),  $K$  is the wave vector,  $E$  is the energy corresponding to the wave vector, and the  $\tau$  is relaxation time. The light absorption coefficient of the heterogeneous structure can be obtained using the following formula:<sup>6</sup>

$$\alpha(\omega) = \sqrt{2}\omega [\sqrt{\varepsilon_1^2(\omega) + \varepsilon_2^2(\omega)} - \varepsilon_1(\omega)]^{1/2} \quad (13)$$

The real and imaginary parts of the complex dielectric function are represented as  $\varepsilon_1(\omega)$  and  $\varepsilon_2(\omega)$ , respectively.

The imaginary component of the dielectric matrix is calculated as a summation over the unoccupied states:

$$\begin{aligned} \varepsilon_2(\omega) = & \frac{4\pi^2 e^2}{\Omega} \lim_{q \rightarrow \infty} \frac{1}{q^2} \sum 2w_k \delta(\varepsilon_{ck} - \varepsilon_{vk} - \omega) \\ & \times \langle \mu_{ck} + e_{\alpha} | \mu_{vk} \rangle \langle \mu_{ck+e_{\beta}} | \mu_{vk}^* \rangle \end{aligned} \quad (14)$$

where  $\Omega$  represents the volume of unit cell,  $c$  and  $v$  refer to the conduction and valence band states, and  $\mu_{ck}$  is an eigenstate of the wave vector  $k$ . The symbols  $\alpha$  and  $\beta$  specify the  $x$  and  $y$  directions.

The PCE is determined using Scharber's method, which is described as follows:<sup>6,7</sup>

$$\eta = \frac{V_{OC} J_{SC} \beta_{FF}}{P_{solar}} = \frac{0.65(E_g^d - \Delta E_C - 0.3) \int_{E_g^d}^{\infty} \frac{P(\hbar\omega)}{\hbar\omega} d(\hbar\omega)}{\int_0^{\infty} P(\hbar\omega) d(\hbar\omega)} \quad (15)$$

where  $V_{OC}$ ,  $J_{SC}$ ,  $\beta_{FF}$ , and  $P_{solar}$  stand for the maximum open-circuit voltage ( $V_{OC} = E_g^d - \Delta E_C - 0.3$ ) heterojunction, the short-circuit current limit of 100% for external quantum efficiency (EQE), the bound filling factor ( $\beta_{FF}=0.65$ ), and the AM1.5 solar flux (AM1.5 is the average yearly sun intensity at latitude 30° north), respectively.

**Table S1** Elastic constants  $C_{ij}$  (in N/m) of the 2H-MX<sub>2</sub>/WS<sub>2</sub> and MX<sub>2</sub>/MoSe<sub>2</sub> (M=Cr, Mo, W. X=S, Se, Te ) heterojunctions.

| Heterojunction                       | $C_{11}$ | $C_{12}$ | $C_{66}$ | $C_{11}C_{22}-C_{12}^2$ |
|--------------------------------------|----------|----------|----------|-------------------------|
| CrS <sub>2</sub> /WS <sub>2</sub>    | 273.64   | 59.29    | 107.17   | 71362.33                |
| CrSe <sub>2</sub> /WS <sub>2</sub>   | 249.91   | 59.45    | 95.23    | 58921.97                |
| MoS <sub>2</sub> /WS <sub>2</sub>    | 286.27   | 62.71    | 111.78   | 78017.47                |
| MoSe <sub>2</sub> /WS <sub>2</sub>   | 264.21   | 54.62    | 104.80   | 66825.60                |
| WSe <sub>2</sub> /WS <sub>2</sub>    | 278.24   | 51.80    | 113.22   | 74732.80                |
| CrSe <sub>2</sub> /MoSe <sub>2</sub> | 215.38   | 50.05    | 82.67    | 43885.57                |
| CrTe <sub>2</sub> /MoSe <sub>2</sub> | 573.24   | -237.32  | 405.28   | 272285.61               |
| MoS <sub>2</sub> /MoSe <sub>2</sub>  | 252.11   | 55.57    | 98.27    | 60468.97                |
| MoTe <sub>2</sub> /MoSe <sub>2</sub> | 200.97   | 41.72    | 79.62    | 38646.84                |
| WSe <sub>2</sub> /MoSe <sub>2</sub>  | 239.84   | 45.73    | 97.06    | 55433.16                |
| WTe <sub>2</sub> /MoSe <sub>2</sub>  | 211.01   | 36.24    | 87.38    | 43210.75                |

**Table S2** The optimized lattice parameters ( $l_a$ ), band gaps ( $E_g$ ) based on HSE06, \* represents results from other references.

| Heterojunction    | $l_a$ (Å) | $l_a^*$ (Å)        | $E_g$ (eV) | $E_g^*$ (eV)       |
|-------------------|-----------|--------------------|------------|--------------------|
| CrS <sub>2</sub>  | 3.02      | 3.00 <sup>8</sup>  | 1.69       | 1.48 <sup>9</sup>  |
| CrSe <sub>2</sub> | 3.19      | 3.18 <sup>10</sup> | 0.70       | 0.69 <sup>11</sup> |
| CrTe <sub>2</sub> | 3.49      | 3.49 <sup>10</sup> | 0.92       | 0.93 <sup>12</sup> |
| MoS <sub>2</sub>  | 3.16      | 3.16 <sup>13</sup> | 2.24       | 2.30 <sup>14</sup> |
| MoSe <sub>2</sub> | 3.29      | 3.29 <sup>13</sup> | 2.02       | 2.07 <sup>14</sup> |
| MoTe <sub>2</sub> | 3.52      | 3.52 <sup>13</sup> | 1.60       | 1.67 <sup>14</sup> |
| WS <sub>2</sub>   | 3.17      | 3.15 <sup>13</sup> | 2.38       | 2.44 <sup>14</sup> |
| WSe <sub>2</sub>  | 3.29      | 3.28 <sup>13</sup> | 2.12       | 2.20 <sup>14</sup> |
| WTe <sub>2</sub>  | 3.52      | 3.56 <sup>13</sup> | 1.61       | 1.67 <sup>14</sup> |

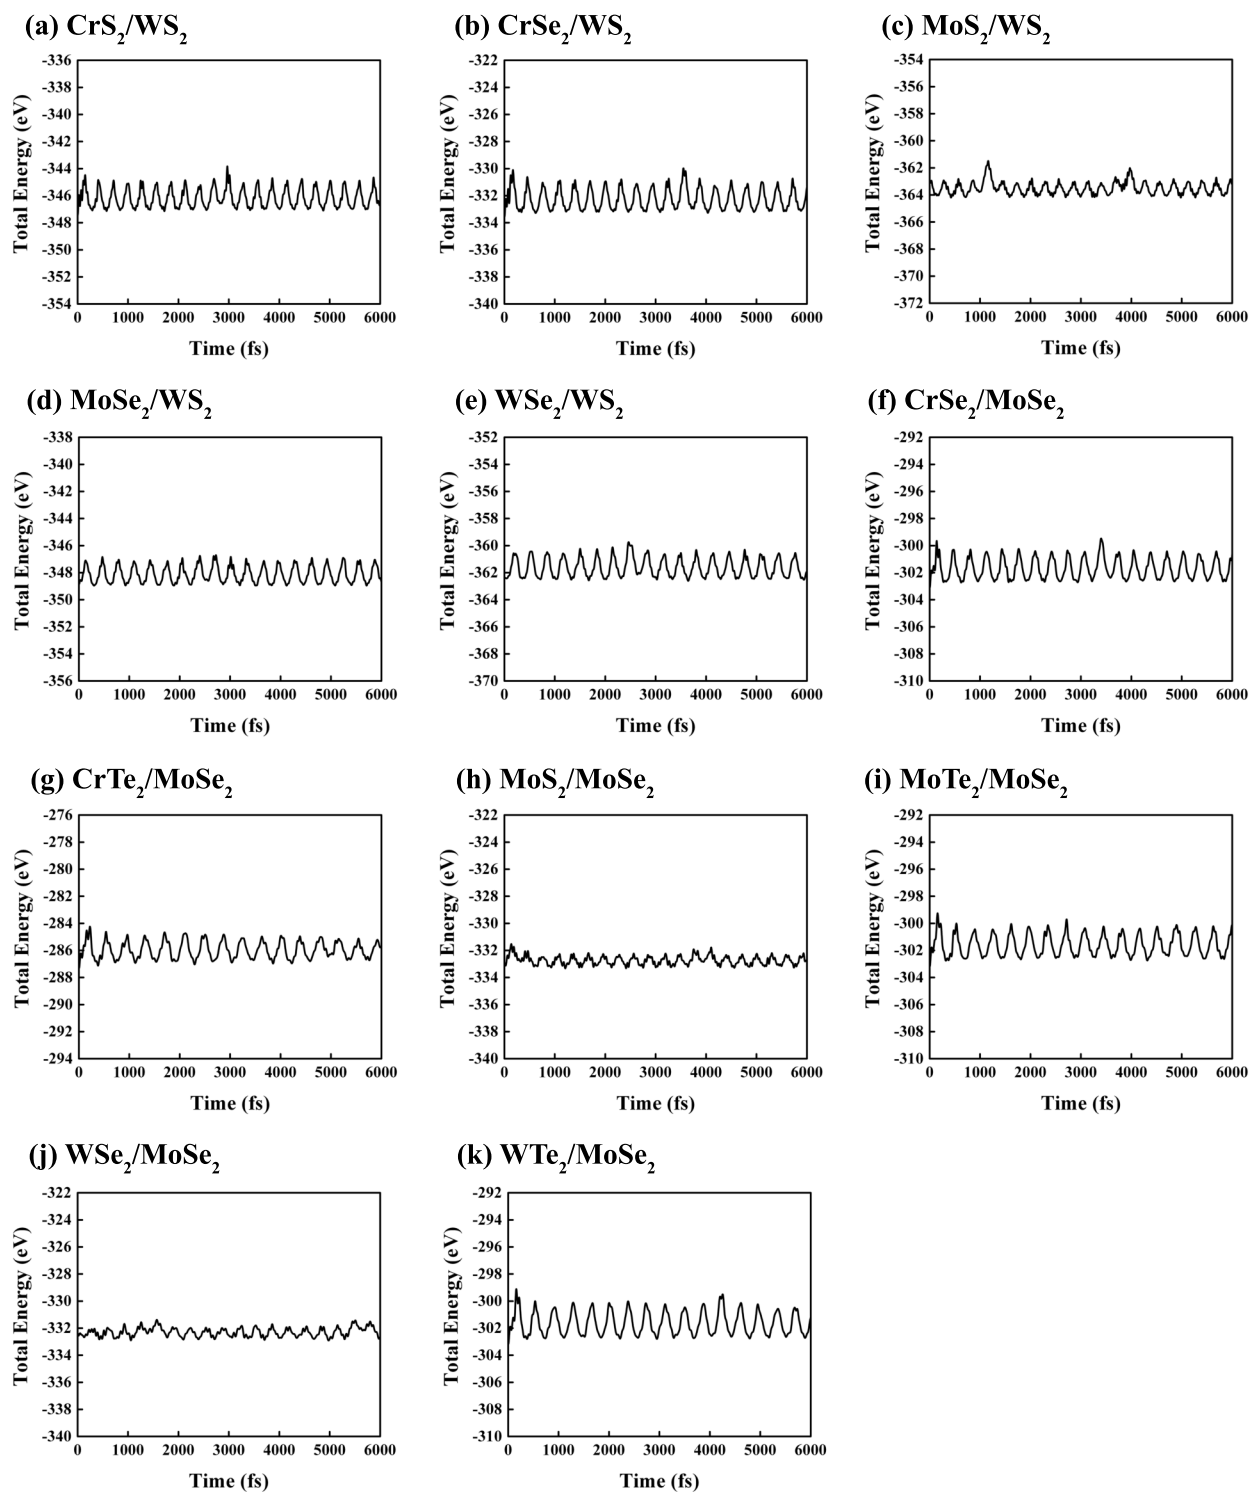

**Fig. S1** (a)-(k) The time dependent evolution of the total energy in the AIMD simulation.

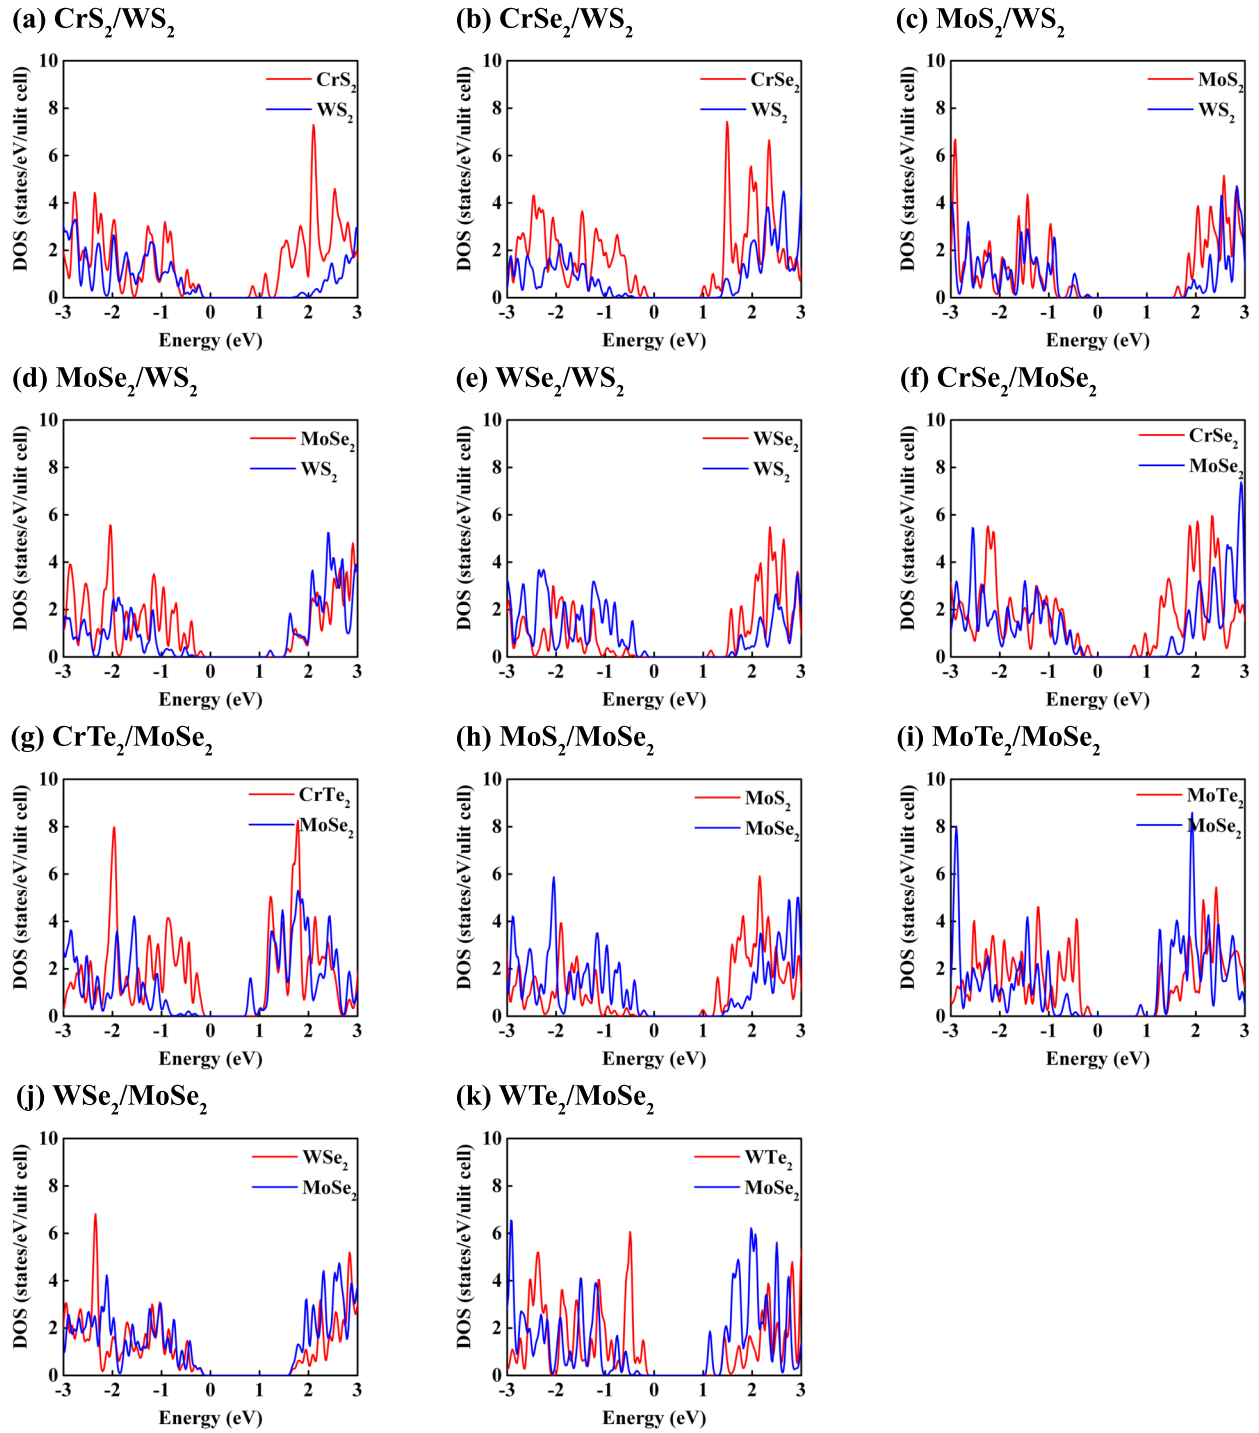

**Fig. S2** The PDOS of 2H-MX<sub>2</sub>/WS<sub>2</sub> and MX<sub>2</sub>/MoSe<sub>2</sub> heterojunctions.

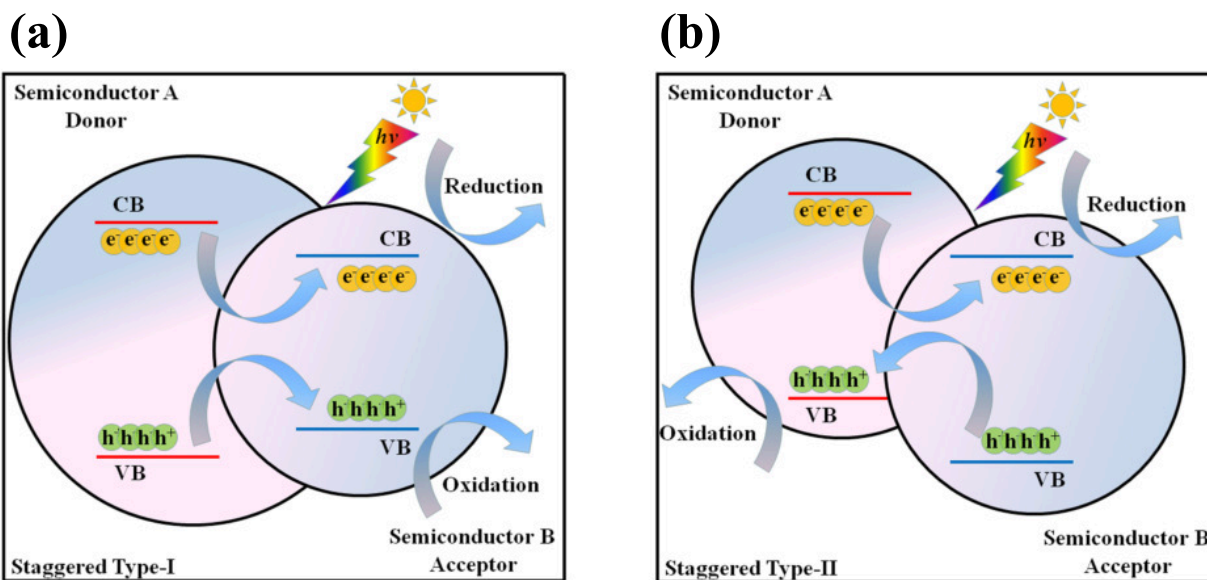

**Fig. S3** Diagrammatic representation of the two distinct mechanisms for electron–hole pair separation in traditional light-responsive heterojunction photocatalysts: (a) type-I and (b) type-II.

**Table S3** Calculated effective carrier mass  $m$  ( $m_0$ ), deformation potential  $E$  (eV), in-plane stiffness  $C_{2D}$  (N/m), and carrier mobility  $\mu$  ( $\text{cm}^2 \text{V}^{-1} \text{s}^{-1}$ ) along the  $x$  and  $y$  directions.

| Carrier type | Heterojunction    | $m_x$ | $m_y$ | $E_x$ | $E_y$ | $C_x$ | $C_y$ | $\mu_x$ | $\mu_y$ |
|--------------|-------------------|-------|-------|-------|-------|-------|-------|---------|---------|
| Electron     | MoS <sub>2</sub>  | 0.412 | 0.415 | 8.27  | 2.94  | 137.7 | 136.9 | 69.34   | 543.21  |
|              | MoSe <sub>2</sub> | 0.566 | 0.419 | 7.49  | 2.61  | 113.7 | 114.4 | 50.84   | 570.58  |
|              | WS <sub>2</sub>   | 0.114 | 0.556 | 7.25  | 2.16  | 109.3 | 143.2 | 258.87  | 783.25  |
|              | WSe <sub>2</sub>  | 0.923 | 0.532 | 7.58  | 2.28  | 126.5 | 127.3 | 33.85   | 651.87  |
| Hole         | MoS <sub>2</sub>  | 0.453 | 0.466 | 8.28  | 2.97  | 137.7 | 136.9 | 62.94   | 472.21  |
|              | MoSe <sub>2</sub> | 0.552 | 0.492 | 7.34  | 2.58  | 113.7 | 114.4 | 54.23   | 495.20  |
|              | WS <sub>2</sub>   | 1.829 | 1.209 | 7.83  | 2.16  | 109.3 | 143.2 | 13.83   | 359.58  |
|              | WSe <sub>2</sub>  | 0.448 | 0.437 | 7.50  | 2.18  | 126.5 | 127.3 | 71.24   | 868.68  |

(a)  $\text{MoS}_2/\text{WS}_2$

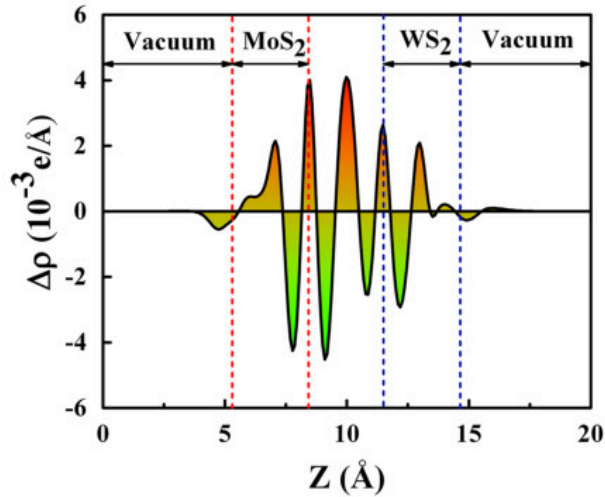

(b)  $\text{MoSe}_2/\text{WS}_2$

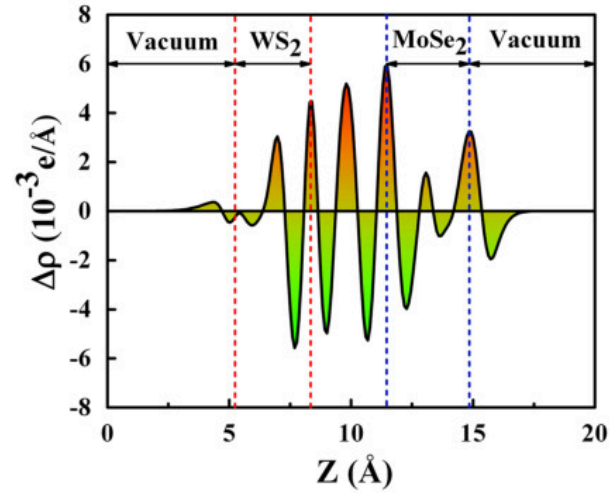

(c)  $\text{WSe}_2/\text{WS}_2$

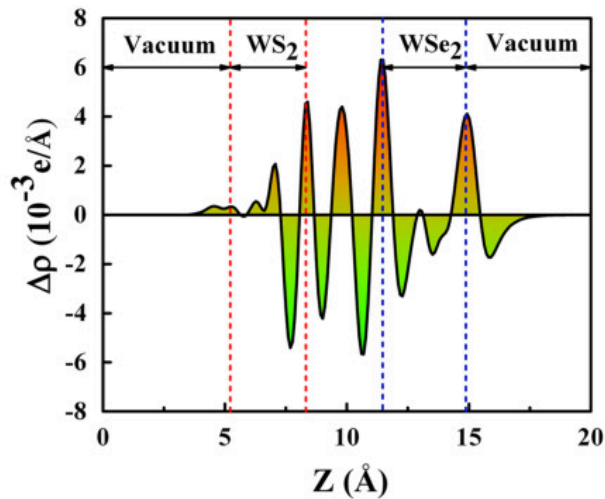

(d)  $\text{WSe}_2/\text{MoSe}_2$

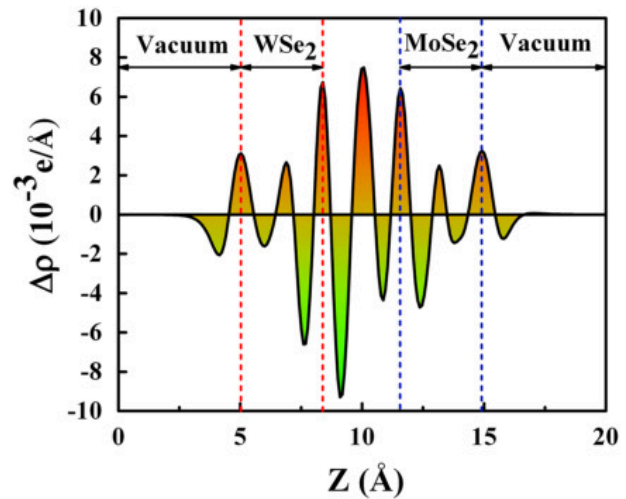

**Fig. S4** (a)-(d) plane averaged potential drop along the z-direction of the  $\text{MoS}_2/\text{WS}_2$ ,  $\text{MoSe}_2/\text{WS}_2$ ,  $\text{WSe}_2/\text{WS}_2$ , and  $\text{WSe}_2/\text{MoSe}_2$ , respectively. Red represents charge accumulation, while green represents charge depletion.



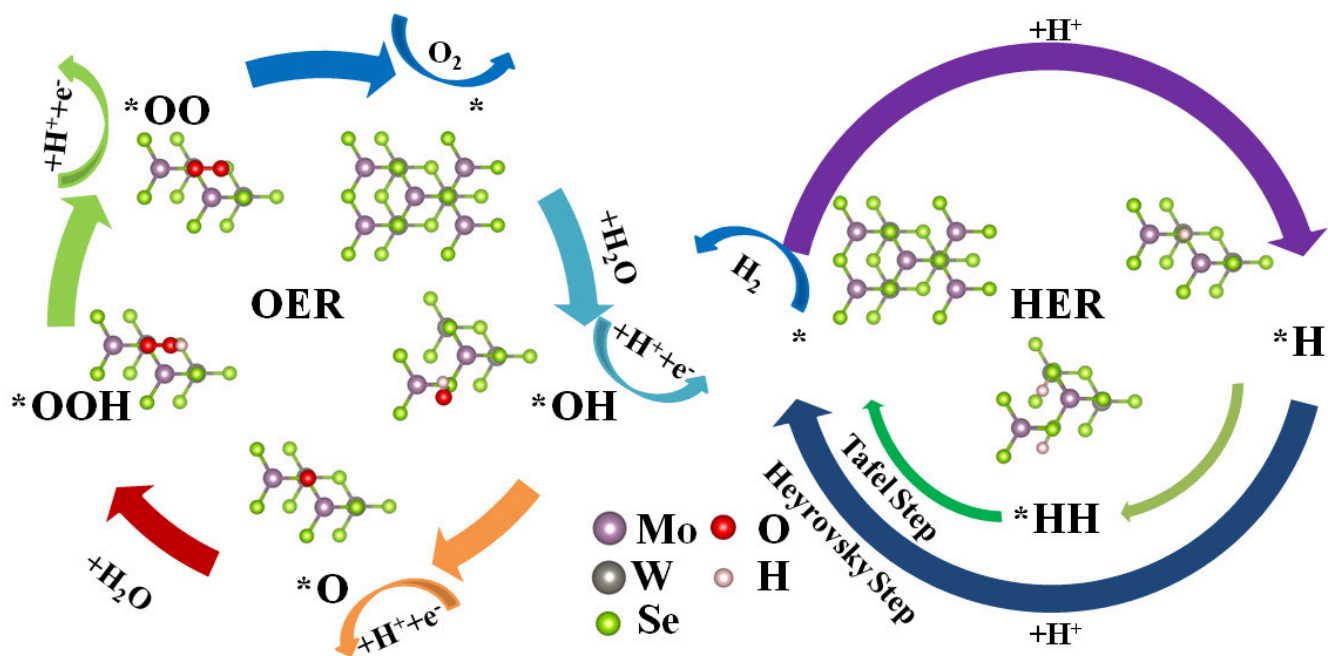

**Fig. S5** The structural transitions of the entire OER and HER processes.

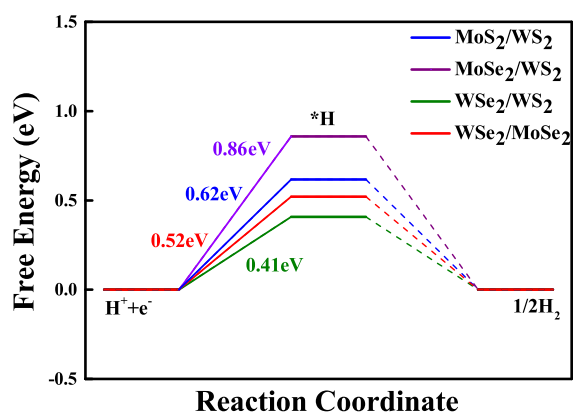

**Fig. S6** Free energy diagram for the HER at the equilibrium potential ( $U=1.23\text{V}$ ).

**Table S4** The PCE of various heterojunctions. \* represents this work.

| Heterojunction                        | PCE                  | Heterojunction                         | PCE                  |
|---------------------------------------|----------------------|----------------------------------------|----------------------|
| Te/WTe <sub>2</sub>                   | 22.50% <sup>15</sup> | Te/MoTe <sub>2</sub>                   | 20.10% <sup>15</sup> |
| MoS <sub>2</sub> /BP                  | 20.42% <sup>16</sup> | phosphorene/MoS <sub>2</sub>           | 17.50% <sup>17</sup> |
| PtS <sub>2</sub> /MoTe <sub>2</sub>   | 13.60% <sup>18</sup> | BP/SnSe                                | 17.24% <sup>19</sup> |
| PN/WSe <sub>2</sub>                   | 13.80% <sup>20</sup> | MoS <sub>2</sub> / $\psi$ -phosphorene | 20.26% <sup>21</sup> |
| WS <sub>2</sub> /MoS <sub>2</sub>     | 12.93% <sup>22</sup> | WS <sub>2</sub> /MoS <sub>2</sub> *    | 13.82%               |
| MoSe <sub>2</sub> /MoS <sub>2</sub>   | 18.64% <sup>22</sup> | MoSe <sub>2</sub> /MoS <sub>2</sub> *  | 15.83%               |
| MoSe <sub>2</sub> /WS <sub>2</sub>    | 17.79% <sup>22</sup> | MoSe <sub>2</sub> /WS <sub>2</sub> *   | 20.11%               |
| WSe <sub>2</sub> /MoSe <sub>2</sub>   | 16.15% <sup>22</sup> | WSe <sub>2</sub> /MoSe <sub>2</sub> *  | 18.19%               |
| WSe <sub>2</sub> /WS <sub>2</sub>     | 19.25% <sup>22</sup> | WSe <sub>2</sub> /WS <sub>2</sub> *    | 16.89%               |
| WSe <sub>2</sub> /MoS <sub>2</sub>    | 14.35% <sup>22</sup> | CrS <sub>2</sub> /WS <sub>2</sub> *    | 9.00%                |
| WTe <sub>2</sub> /MoSe <sub>2</sub> * | 23.10%               | MoTe <sub>2</sub> /MoSe <sub>2</sub> * | 25.84%               |

**Table S5** Atomic lattices in VASP POSCAR format.

---

|                                   |                    |                     |
|-----------------------------------|--------------------|---------------------|
| CrS <sub>2</sub> /WS <sub>2</sub> |                    |                     |
| 1.0000000000000000                |                    |                     |
| 3.1055505547419062                | 0.0000000000000000 | 0.0000000000000000  |
| -1.5527752773709531               | 2.6894860393690649 | 0.0000000000000000  |
| 0.0000000000000000                | 0.0000000000000000 | 21.2014999390000014 |
| Cr S W                            |                    |                     |
| 1 4 1                             |                    |                     |
| Direct                            |                    |                     |
| 0.6666660824732915                | 0.3333339465271052 | 0.3245239978819399  |
| 0.6666683901520472                | 0.3333316388475609 | 0.5407267840104879  |
| 0.6666684068844049                | 0.3333316221152032 | 0.6912896284138128  |
| 0.3333327251618314                | 0.6666673038383308 | 0.2561927154864136  |
| 0.3333327519017644                | 0.6666672770983908 | 0.3927263723128362  |
| 0.0000017254266638                | 0.9999982745734073 | 0.6159404738945256  |

---

|                                    |                    |                     |
|------------------------------------|--------------------|---------------------|
| CrSe <sub>2</sub> /WS <sub>2</sub> |                    |                     |
| 1.0000000000000000                 |                    |                     |
| 3.1755542925400984                 | 0.0000000000000000 | 0.0000000000000000  |
| -1.5877771462700492                | 2.7501078439451416 | 0.0000000000000000  |
| 0.0000000000000000                 | 0.0000000000000000 | 21.2014999390000014 |
| Cr S Se W                          |                    |                     |
| 1 2 2 1                            |                    |                     |
| Direct                             |                    |                     |
| 0.6666661614290703                 | 0.3333338672792081 | 0.3214882731749569  |
| 0.6666682816649399                 | 0.3333317472528634 | 0.5450217813300640  |
| 0.6666683091076067                 | 0.3333317198081005 | 0.6930731698754116  |
| 0.3333328624135490                 | 0.6666671667259862 | 0.2471302969788240  |
| 0.3333329269515133                 | 0.6666671021867288 | 0.3957257403055010  |
| 0.0000015404333098                 | 0.9999984597471112 | 0.6189607103352444  |

---

---

|                                    |                    |                     |
|------------------------------------|--------------------|---------------------|
| CrTe <sub>2</sub> /WS <sub>2</sub> |                    |                     |
| 1.0000000000000000                 |                    |                     |
| 3.2886901931097521                 | 0.0000000000000000 | 0.0000000000000000  |
| -1.6443450965548760                | 2.8480909173629838 | 0.0000000000000000  |
| 0.0000000000000000                 | 0.0000000000000000 | 21.2014999390000014 |
| Cr S Te W                          |                    |                     |
| 1 2 2 1                            |                    |                     |
| Direct                             |                    |                     |
| 0.6666674393444083                 | 0.3333339595692735 | 0.3154145834825357  |
| 0.6666670950861118                 | 0.3333318269114045 | 0.5529307384278184  |
| 0.6666669669859999                 | 0.3333314416308184 | 0.6972911470370775  |
| 0.3333357069055367                 | 0.6666669578594977 | 0.2322337069817664  |
| 0.3333325777987852                 | 0.6666677189479771 | 0.3984999315265227  |
| 0.0000002958791683                 | 0.9999981580810271 | 0.6250298645442882  |

---

|                                    |                    |                     |
|------------------------------------|--------------------|---------------------|
| MoS <sub>2</sub> /WSe <sub>2</sub> |                    |                     |
| 1.0000000000000000                 |                    |                     |
| 3.1660921421639152                 | 0.0000000000000000 | 0.0000000000000000  |
| -1.5830460710819576                | 2.7419162258309129 | 0.0000000000000000  |
| 0.0000000000000000                 | 0.0000000000000000 | 21.2014999390000014 |
| Mo S W                             |                    |                     |
| 1 4 1                              |                    |                     |
| Direct                             |                    |                     |
| 0.6666666870000029                 | 0.3333333429999996 | 0.3237405409313610  |
| 0.6666666870000029                 | 0.3333333429999996 | 0.5426076140989338  |
| 0.6666666870000029                 | 0.3333333429999996 | 0.6909890797682081  |
| 0.3333333429999996                 | 0.6666666870000029 | 0.2498336015311793  |
| 0.3333333429999996                 | 0.6666666870000029 | 0.3975112134683414  |
| 0.0000000000000000                 | 0.0000000000000000 | 0.6167179822019762  |

---

---

|                                    |                    |                     |
|------------------------------------|--------------------|---------------------|
| MoSe <sub>2</sub> /WS <sub>2</sub> |                    |                     |
| 1.0000000000000000                 |                    |                     |
| 3.2262119268888956                 | 0.0000000000000000 | 0.0000000000000000  |
| -1.6131059634444478                | 2.7939814866724508 | 0.0000000000000000  |
| 0.0000000000000000                 | 0.0000000000000000 | 21.2014999390000014 |
| W Se Mo S                          |                    |                     |
| 1 2 1 2                            |                    |                     |
| Direct                             |                    |                     |
| 0.6666666870000029                 | 0.3333333429999996 | 0.3200840484661143  |
| 0.6666666870000029                 | 0.3333333429999996 | 0.5403913972699925  |
| 0.6666666870000029                 | 0.3333333429999996 | 0.7005349871969599  |
| 0.0000000000000000                 | 0.0000000000000000 | 0.6203710258167519  |
| 0.3333333429999996                 | 0.6666666870000029 | 0.2468445656053433  |
| 0.3333333429999996                 | 0.6666666870000029 | 0.3931740076448307  |

---

|                                    |                    |                     |
|------------------------------------|--------------------|---------------------|
| MoTe <sub>2</sub> /WS <sub>2</sub> |                    |                     |
| 1.0000000000000000                 |                    |                     |
| 3.3261171299554873                 | 0.0000000000000000 | 0.0000000000000000  |
| -1.6630585649777436                | 2.8796123074976441 | 0.0000000000000000  |
| 0.0000000000000000                 | 0.0000000000000000 | 21.2014999390000014 |
| Mo S Te W                          |                    |                     |
| 1 2 2 1                            |                    |                     |
| Direct                             |                    |                     |
| 0.6666874869365174                 | 0.3333738200875587 | 0.3142950355090477  |
| 0.6666630706861199                 | 0.3333239294945471 | 0.5546310497818041  |
| 0.6666630537439886                 | 0.3333238875762206 | 0.6978144124231775  |
| 0.3333231457527219                 | 0.6666450509674959 | 0.2251311347470732  |
| 0.3333220998838371                 | 0.6666431439605986 | 0.4033976701210662  |
| 0.0000112249968041                 | 0.0000202309135773 | 0.6261306694178330  |

---

---

|                                   |                    |                     |
|-----------------------------------|--------------------|---------------------|
| WSe <sub>2</sub> /WS <sub>2</sub> |                    |                     |
| 1.0000000000000000                |                    |                     |
| 3.2260240174904533                | 0.0000000000000000 | 0.0000000000000000  |
| -1.6130120087452267               | 2.7938187523597935 | 0.0000000000000000  |
| 0.0000000000000000                | 0.0000000000000000 | 21.2014999390000014 |
| W Se S                            |                    |                     |
| 2 2 2                             |                    |                     |
| Direct                            |                    |                     |
| 0.6666666870000029                | 0.3333333429999996 | 0.3193673122038163  |
| 0.0000000000000000                | 0.0000000000000000 | 0.6211002569801707  |
| 0.6666666870000029                | 0.3333333429999996 | 0.5406522070482893  |
| 0.6666666870000029                | 0.3333333429999996 | 0.7017011957291928  |
| 0.3333333429999996                | 0.6666666870000029 | 0.2461255895291430  |
| 0.3333333429999996                | 0.6666666870000029 | 0.3924534705093947  |

---

|                                   |                    |                     |
|-----------------------------------|--------------------|---------------------|
| WTe <sub>2</sub> /WS <sub>2</sub> |                    |                     |
| 1.0000000000000000                |                    |                     |
| 3.3274440761286970                | 0.0000000000000000 | 0.0000000000000000  |
| -1.6637220380643485               | 2.8816772715970096 | 0.0000000000000000  |
| 0.0000000000000000                | 0.0000000000000000 | 21.2014999390000014 |
| W S Te                            |                    |                     |
| 2 2 2                             |                    |                     |
| Direct                            |                    |                     |
| 0.6666660296117755                | 0.3333339994266069 | 0.3143855495921670  |
| 0.0000006058180233                | 0.9999993941460730 | 0.6260353055576928  |
| 0.6666679024033542                | 0.3333321266219968 | 0.5545650232159502  |
| 0.6666676005487133                | 0.3333324284722892 | 0.6976930474151857  |
| 0.3333339822083943                | 0.6666660467768892 | 0.2246998029917791  |
| 0.3333339614097355                | 0.6666660675561431 | 0.4040212432272341  |

---

---

|                                     |                    |                     |
|-------------------------------------|--------------------|---------------------|
| CrS <sub>2</sub> /MoSe <sub>2</sub> |                    |                     |
| 1.0000000000000000                  |                    |                     |
| 3.1690270144846413                  | 0.0000000000000000 | 0.0000000000000000  |
| -1.5845135072423207                 | 2.7444609017830230 | 0.0000000000000000  |
| 0.0000000000000000                  | 0.0000000000000000 | 21.2014999390000014 |
| Cr Se S Mo                          |                    |                     |
| 1 2 2 1                             |                    |                     |
| Direct                              |                    |                     |
| 0.6666659289284596                  | 0.3333331668321691 | 0.3212315655591738  |
| 0.6666683577842321                  | 0.3333323500066072 | 0.5380949431286481  |
| 0.6666683989000575                  | 0.3333323282884706 | 0.7004988438134490  |
| 0.333333300851891                   | 0.6666670244755650 | 0.2536741598200365  |
| 0.3333334421716643                  | 0.6666669952211990 | 0.3886702047353765  |
| 0.0000006241303865                  | 0.9999981981759944 | 0.6192302549433180  |

---

|                                      |                    |                     |
|--------------------------------------|--------------------|---------------------|
| CrSe <sub>2</sub> /MoSe <sub>2</sub> |                    |                     |
| 1.0000000000000000                   |                    |                     |
| 3.2443991322063912                   | 0.0000000000000000 | 0.0000000000000000  |
| -1.6221995661031956                  | 2.8097277339265974 | 0.0000000000000000  |
| 0.0000000000000000                   | 0.0000000000000000 | 21.2014999390000014 |
| Cr Se Mo                             |                    |                     |
| 1 4 1                                |                    |                     |
| Direct                               |                    |                     |
| 0.6666672308518997                   | 0.3333327972993061 | 0.3172708064279135  |
| 0.6666682767373615                   | 0.3333317522376902 | 0.5434773047081407  |
| 0.6666682941711315                   | 0.3333317348060731 | 0.7030301957025031  |
| 0.3333323216183715                   | 0.6666677078125645 | 0.2438676437889384  |
| 0.3333324762456016                   | 0.6666675531851283 | 0.3905755202042371  |
| 0.0000014823756302                   | 0.9999985176592361 | 0.6231785011682618  |

---

---

|                                      |                    |                     |
|--------------------------------------|--------------------|---------------------|
| CrTe <sub>2</sub> /MoSe <sub>2</sub> |                    |                     |
| 1.0000000000000000                   |                    |                     |
| 3.4506760212821064                   | 0.0000000000000000 | 0.0000000000000000  |
| -1.7253380106410532                  | 2.9883757959317561 | 0.0000000000000000  |
| 0.0000000000000000                   | 0.0000000000000000 | 21.2014999390000014 |
| Cr Se Te Mo                          |                    |                     |
| 1 2 2 1                              |                    |                     |
| Direct                               |                    |                     |
| 0.6666665806848826                   | 0.3333334483118620 | 0.3130727039500130  |
| 0.6666683600981784                   | 0.3333316689034405 | 0.5510872939307134  |
| 0.6666683846819055                   | 0.3333316443192516 | 0.7039114390049335  |
| 0.3333328047848383                   | 0.6666672242180098 | 0.2295140129396174  |
| 0.3333328648814557                   | 0.6666671641220887 | 0.3963890219333095  |
| 0.0000010868687355                   | 0.9999989131253386 | 0.6274255002414364  |

---

|                                     |                    |                     |
|-------------------------------------|--------------------|---------------------|
| MoS <sub>2</sub> /MoSe <sub>2</sub> |                    |                     |
| 1.0000000000000000                  |                    |                     |
| 3.2258146521245914                  | 0.0000000000000000 | 0.0000000000000000  |
| -1.6129073260622957                 | 2.7936413089919410 | 0.0000000000000000  |
| 0.0000000000000000                  | 0.0000000000000000 | 21.2014999390000014 |
| Mo S Se                             |                    |                     |
| 2 2 2                               |                    |                     |
| Direct                              |                    |                     |
| 0.6666560500327350                  | 0.3333439400399953 | 0.3199669524272792  |
| 0.0000116690442624                  | 0.9999883417538271 | 0.6204738561101593  |
| 0.3333233589534004                  | 0.6666766895177076 | 0.2470264494229326  |
| 0.3333238629638728                  | 0.6666761854758576 | 0.3928083059719967  |
| 0.6666774961086617                  | 0.3333225274829346 | 0.5404727937065346  |
| 0.6666776448970637                  | 0.3333223787296831 | 0.7006516743611044  |

---



---

|                                      |                    |                     |
|--------------------------------------|--------------------|---------------------|
| MoTe <sub>2</sub> /MoSe <sub>2</sub> |                    |                     |
| 1.0000000000000000                   |                    |                     |
| 3.4022047713032970                   | 0.0000000000000000 | 0.0000000000000000  |
| -1.7011023856516485                  | 2.9463957608187537 | 0.0000000000000000  |
| 0.0000000000000000                   | 0.0000000000000000 | 21.2014999390000014 |
| Mo Se Te                             |                    |                     |
| 2 2 2                                |                    |                     |
| Direct                               |                    |                     |
| 0.6666666870000029                   | 0.3333333429999996 | 0.3102414077960418  |
| 0.0000000000000000                   | 0.0000000000000000 | 0.6301950438871629  |
| 0.6666666870000029                   | 0.3333333429999996 | 0.5531552621862019  |
| 0.6666666870000029                   | 0.3333333429999996 | 0.7073906219611175  |
| 0.3333333429999996                   | 0.6666666870000029 | 0.2226379088017651  |
| 0.3333333429999996                   | 0.6666666870000029 | 0.3977797873677105  |

---

|                                     |                    |                     |
|-------------------------------------|--------------------|---------------------|
| WSe <sub>2</sub> /MoSe <sub>2</sub> |                    |                     |
| 1.0000000000000000                  |                    |                     |
| 3.2909805621213541                  | 0.0000000000000000 | 0.0000000000000000  |
| -1.6454902810606771                 | 2.8500727701518880 | 0.0000000000000000  |
| 0.0000000000000000                  | 0.0000000000000000 | 21.2014999390000014 |
| W Se Mo                             |                    |                     |
| 1 4 1                               |                    |                     |
| Direct                              |                    |                     |
| 0.6666666870000029                  | 0.3333333429999996 | 0.3163634203021957  |
| 0.6666666870000029                  | 0.3333333429999996 | 0.5452536869047293  |
| 0.6666666870000029                  | 0.3333333429999996 | 0.7030909912299705  |
| 0.3333333429999996                  | 0.6666666870000029 | 0.2369904284290882  |
| 0.3333333429999996                  | 0.6666666870000029 | 0.3956230524998503  |
| 0.0000000000000000                  | 0.0000000000000000 | 0.6240784526341727  |

---

---

|                                     |                    |                     |
|-------------------------------------|--------------------|---------------------|
| WTe <sub>2</sub> /MoSe <sub>2</sub> |                    |                     |
| 1.0000000000000000                  |                    |                     |
| 3.4030712785983637                  | 0.0000000000000000 | 0.0000000000000000  |
| -1.7015356392991818                 | 2.9471442251541613 | 0.0000000000000000  |
| 0.0000000000000000                  | 0.0000000000000000 | 21.2014999390000014 |
| W Se Te Mo                          |                    |                     |
| 1 2 2 1                             |                    |                     |
| Direct                              |                    |                     |
| 0.6666668537847187                  | 0.3333331644629638 | 0.3106092899926765  |
| 0.6666676415940316                  | 0.3333323881881327 | 0.5527969467854419  |
| 0.6666676504078382                  | 0.3333323793866754 | 0.7070238888062832  |
| 0.3333339024427104                  | 0.6666661319064104 | 0.2225110428891099  |
| 0.3333339189525617                  | 0.6666661154306937 | 0.3986307888276244  |
| 0.0000001148181354                  | 0.9999998836251223 | 0.6298280146988660  |

---

## References

- 1 J. K. Nørskov, J. Rossmeisl, A. Logadottir, L. Lindqvist, J. R. Kitchin, T. Bligaard and H. Jonsson, *The Journal of Physical Chemistry B*, 2004, **108**, 17886–17892.
- 2 J. K. Nørskov, T. Bligaard, A. Logadottir, J. Kitchin, J. G. Chen, S. Pandelov and U. Stimming, *Journal of The Electrochemical Society*, 2005, **152**, J23.
- 3 S.-i. Takagi, A. Toriumi, M. Iwase and H. Tango, *IEEE Transactions on Electron Devices*, 1994, **41**, 2357–2362.
- 4 J. Xi, M. Long, L. Tang, D. Wang and Z. Shuai, *Nanoscale*, 2012, **4**, 4348–4369.
- 5 J. Chen, J. Xi, D. Wang and Z. Shuai, *The journal of physical chemistry letters*, 2013, **4**, 1443–1448.
- 6 S. Saha, T. Sinha and A. Mookerjee, *Physical Review B*, 2000, **62**, 8828.
- 7 M. C. Scharber, D. Mühlbacher, M. Koppe, P. Denk, C. Waldauf, A. J. Heeger and C. J. Brabec, *Advanced materials*, 2006, **18**, 789–794.
- 8 M. R. Habib, S. Wang, W. Wang, H. Xiao, S. M. Obaidulla, A. Gayen, Y. Khan, H. Chen and M. Xu, *Nanoscale*, 2019, **11**, 20123–20132.
- 9 H. L. Zhuang, M. D. Johannes, M. N. Blonsky and R. G. Hennig, *Applied Physics Letters*, 2014, **104**, year.
- 10 C. M. Bastos, R. Besse, J. L. Da Silva and G. M. Sipahi, *Physical Review Materials*, 2019, **3**, 044002.
- 11 S. Tang, D. Wan, S. Bai, S. Fu, X. Wang, X. Li and J. Zhang, *Physical Chemistry Chemical Physics*, 2023, **25**, 22401–22414.
- 12 S. Bai, S. Tang, M. Wu, D. Luo, J. Zhang, D. Wan and X. Li, *Journal of Alloys and Compounds*, 2023, **930**, 167485.
- 13 M. Ge, L. Chu, F. Zeng, Z. Cao and J. Zhang, *Physical Chemistry Chemical Physics*, 2024, **26**, 23784–23791.
- 14 A. Dias, H. Braganca, J. P. A. de Mendonca and J. L. Da Silva, *ACS Applied Energy Materials*, 2021, **4**, 3265–3278.
- 15 K. Wu, H. Ma, Y. Gao, W. Hu and J. Yang, *Journal of Materials Chemistry A*, 2019, **7**, 7430–7436.

- 16 M. K. Mohanta, A. Rawat, N. Jena, Dimple, R. Ahammed and A. De Sarkar, *ACS Applied Materials & Interfaces*, 2020, **12**, 3114–3126.
- 17 H. Guo, N. Lu, J. Dai, X. Wu and X. C. Zeng, *The Journal of Physical Chemistry C*, 2014, **118**, 14051–14059.
- 18 S. Yin, Q. Luo, D. Wei, G. Guo, X. Sun, Y. Tang and X. Dai, *Results in Physics*, 2022, **33**, 105172.
- 19 W. Dou, A. Huang, Y. Ji, X. Yang, Y. Xin, H. Shi, M. Wang, Z. Xiao, M. Zhou and P. K. Chu, *Physical Chemistry Chemical Physics*, 2020, **22**, 14787–14795.
- 20 X. Zheng, Y. Wei, K. Pang, N. Kaner Tolbert, D. Kong, X. Xu, J. Yang, X. Li and W. Li, *Scientific Reports*, 2020, **10**, 17213.
- 21 H. Wang, X. Li, Z. Liu and J. Yang, *Physical Chemistry Chemical Physics*, 2017, **19**, 2402–2408.
- 22 K. Dange, R. Yogi and A. Shukla, *arXiv preprint arXiv:2501.08138*, 2025.
